# Supplementary material for: Elaborate construction of N/S-co-doped carbon nanobowls for ultrahigh-power supercapacitors
Source: Royal Society of Chemistry journal article supplement (doi:10.1039/c8ta07573e), 2018-01-01
Supplement: c8ta07573e1.pdf [file c8ta07573e1.pdf]

## Supporting Information for

# Elaborate Construction of N/S-co-doped Carbon Nanobowls for Ultra-high Power Supercapacitors

Jian-Gan Wang,<sup>a, b\*</sup> Hongzhen Liu,<sup>a</sup> Xingyuan Zhang,<sup>a</sup> Minhua Shao,<sup>b\*</sup> Bingqing Wei<sup>a, c\*</sup>

<sup>a</sup> *State Key Laboratory of Solidification Processing, Center for Nano Energy Materials, School of Materials Science and Engineering, Northwestern Polytechnical University and Shaanxi Joint Lab of Graphene (NPU), Xi'an 710072, China*

<sup>b</sup> *Department of Chemical and Biological Engineering, Hong Kong University of Science and Technology, Clear Water Bay, Kowloon, Hong Kong, China*

<sup>c</sup> *Department of Mechanical Engineering, University of Delaware, Newark, Delaware 19716, United States*

\*E-mail: wangjiangan@nwpu.edu.cn (J.-G. Wang); kemshao@ust.hk (M. Shao); weib@udel.edu (B. Wei)

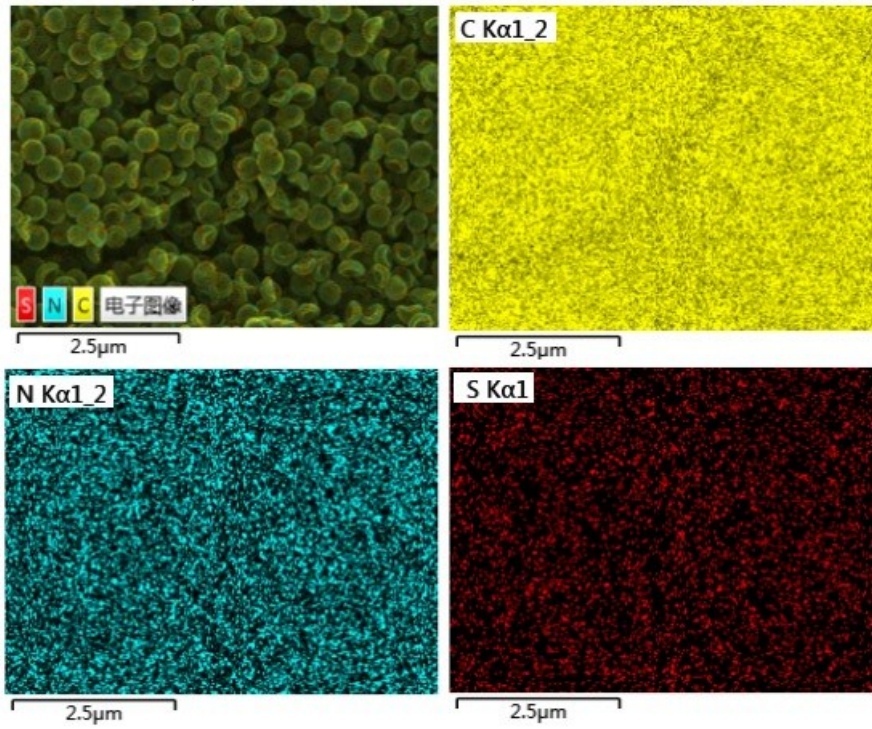

**Fig. S1** EDX elemental mapping of the carbon nanobowls.

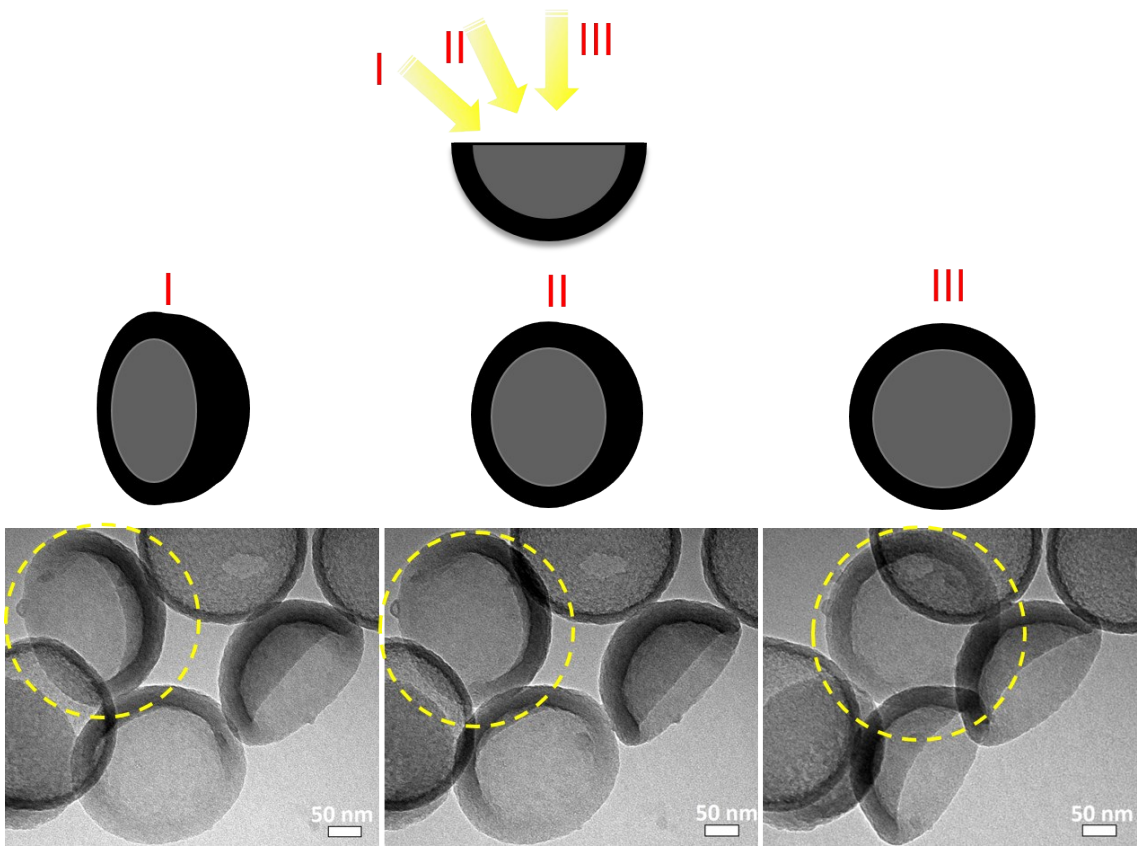

**Fig. S2** TEM observation with different view angles to show the carbon nanobowls.

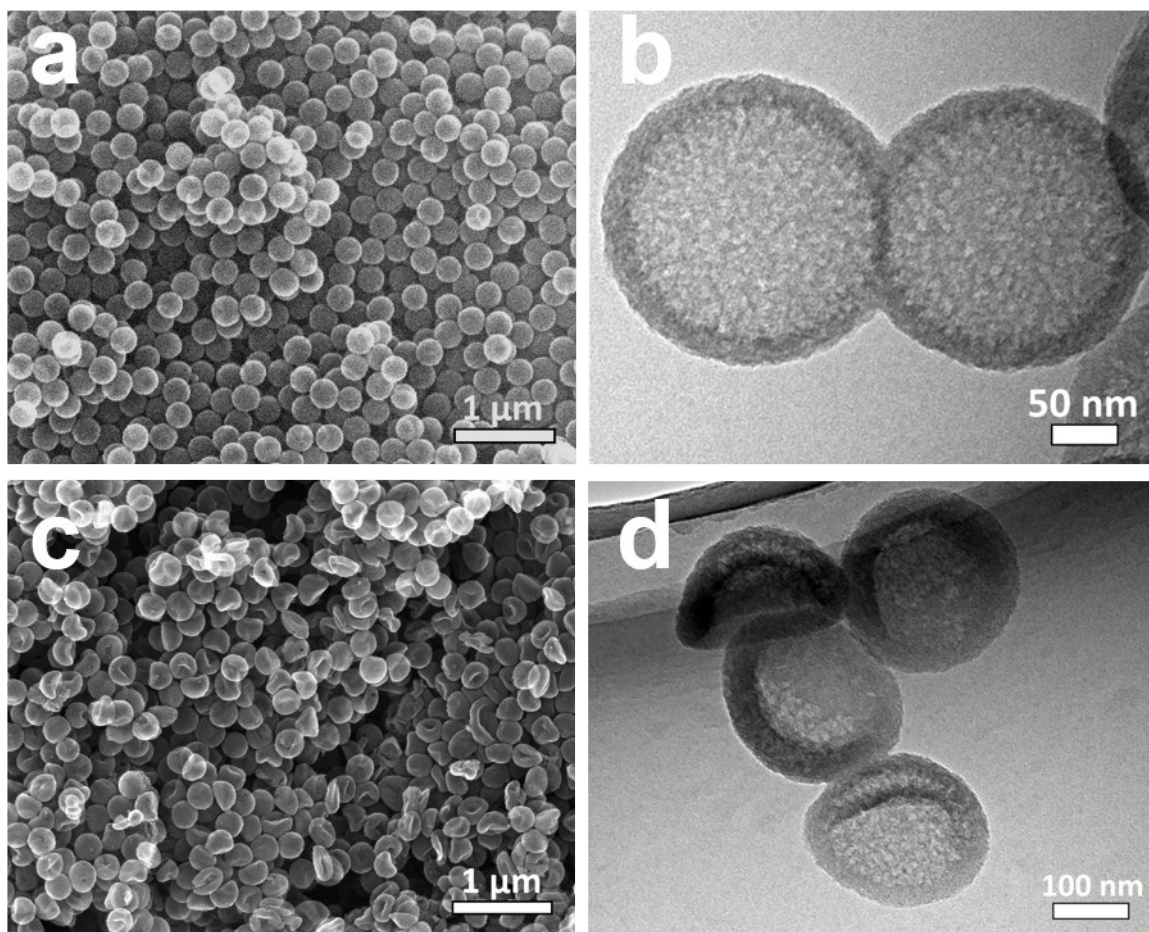

**Fig. S3** SEM and TEM images of carbon nanostructure using freeze drying (a, b) and re-soaking in water with oven drying (c, d).

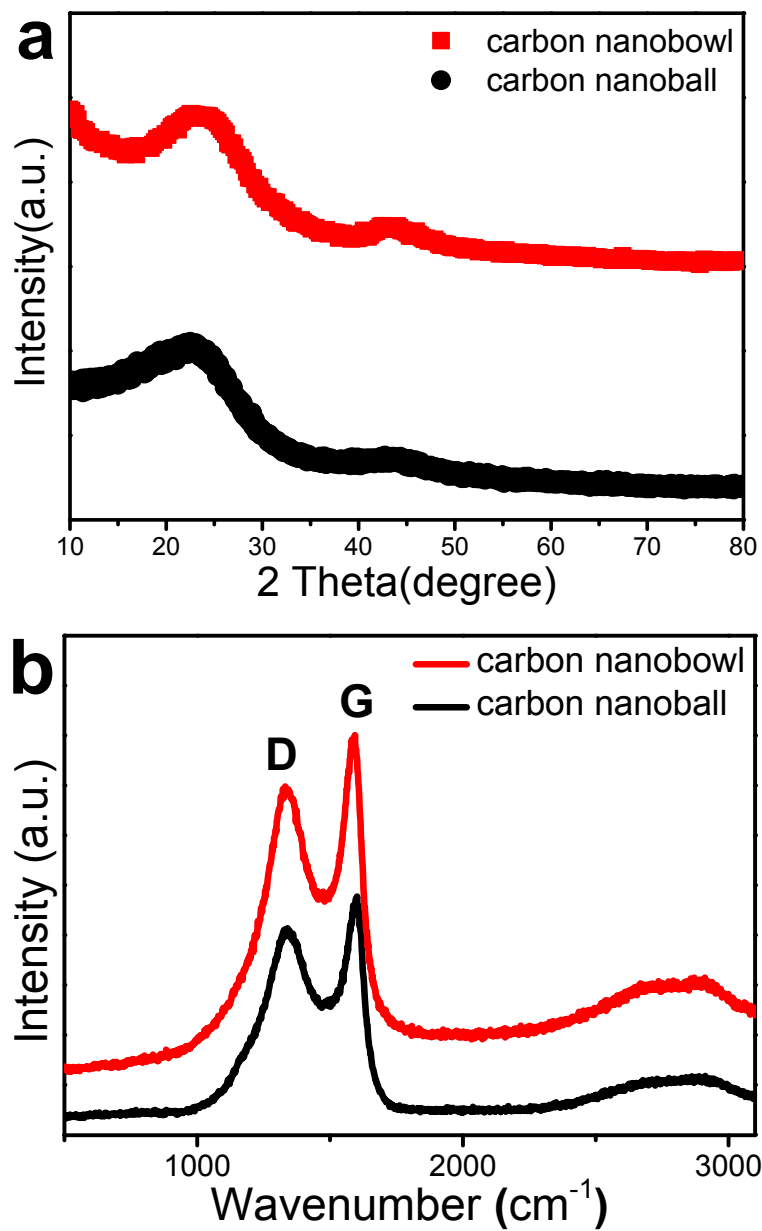

Fig. S4 (a) XRD and (b) Raman spectra of the carbon samples.

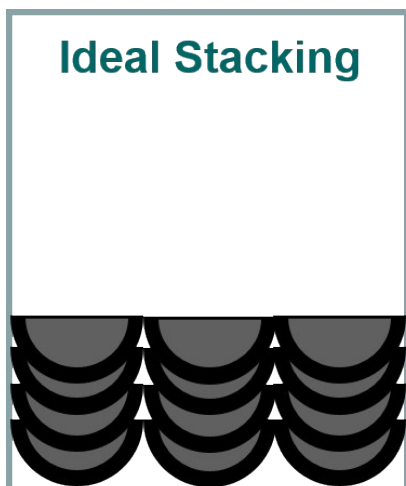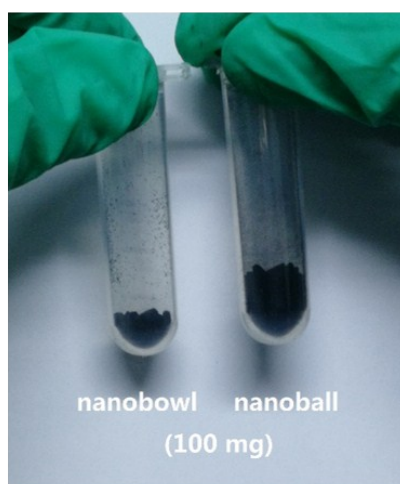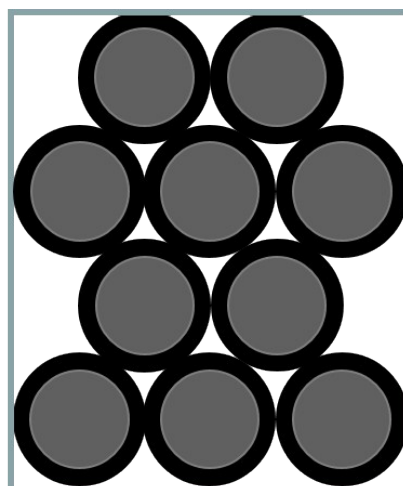

**Fig. S5** Volume comparison of the carbon nanobowl and nanoball samples having the same mass of 100 mg. The illustrations present the ideal stacking of nanobowls (number: 12) and nanoballs (number: 10), showing a significant reduction in the volume occupy for the nanobowl samples.

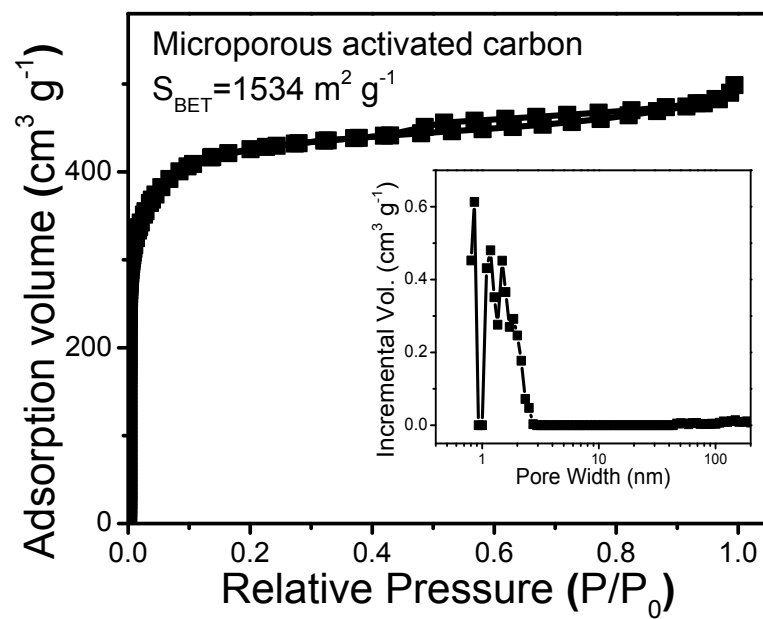

**Fig. S6**  $\text{N}_2$  adsorption/desorption isotherm and its corresponding pore size distribution of commercial activated carbon.

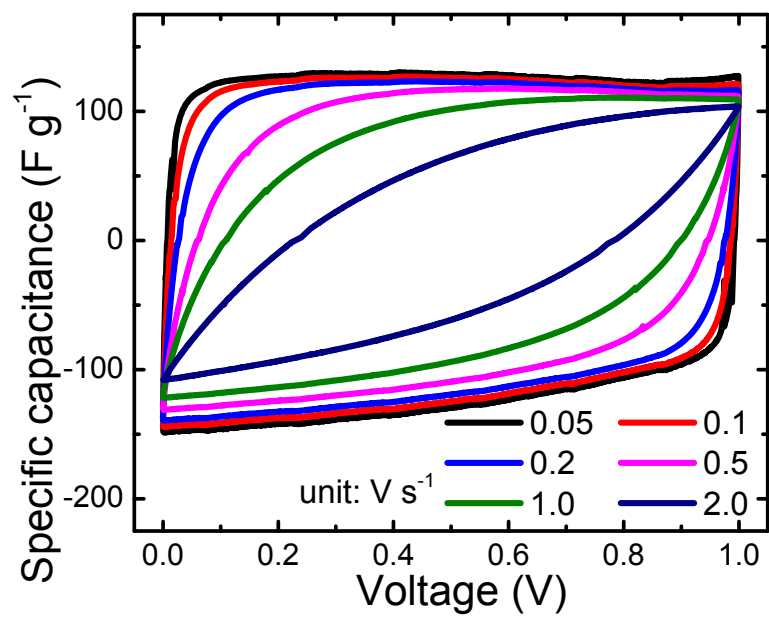

Fig. S7. CV curves of activated carbon electrode at various scan rates.



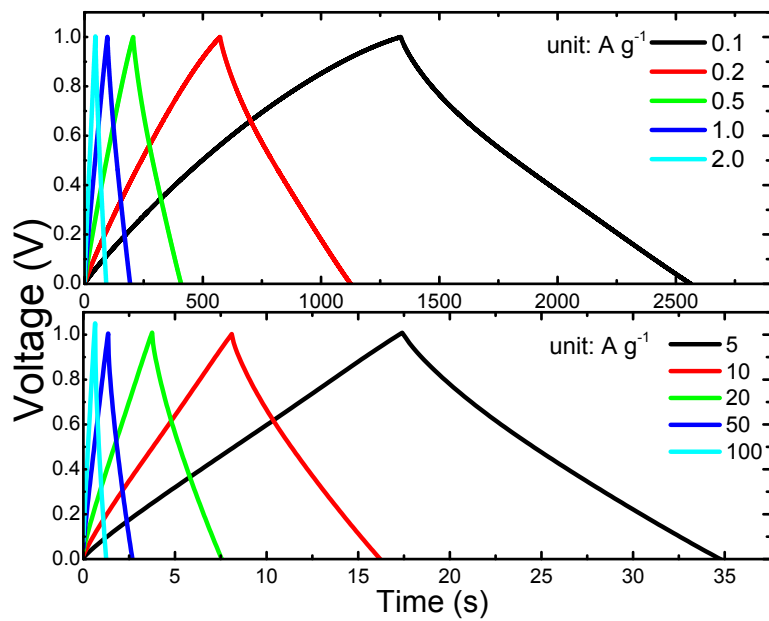

**Fig. S8.** Galvanostatic charge/discharge curves of carbon nanoball electrode at various current densities.

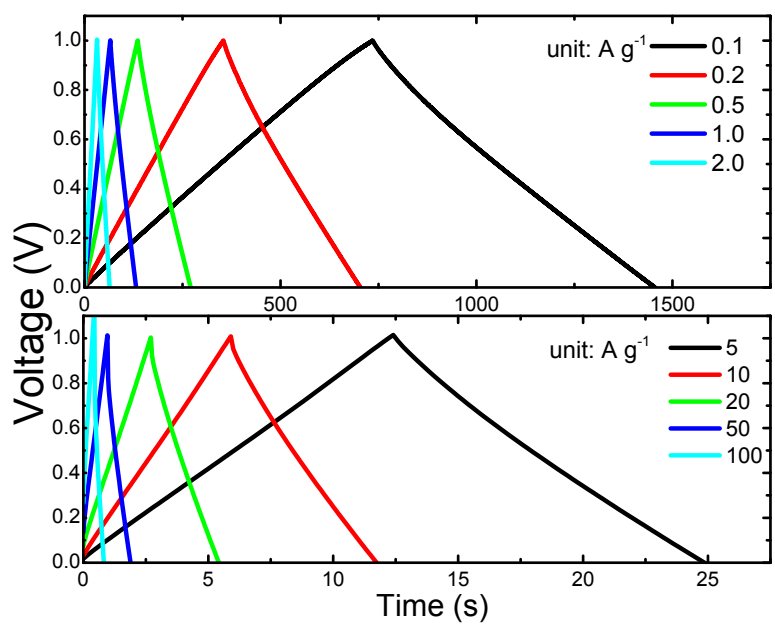

**Fig. S9** Galvanostatic charge/discharge curves of activated carbon electrode at various current densities.

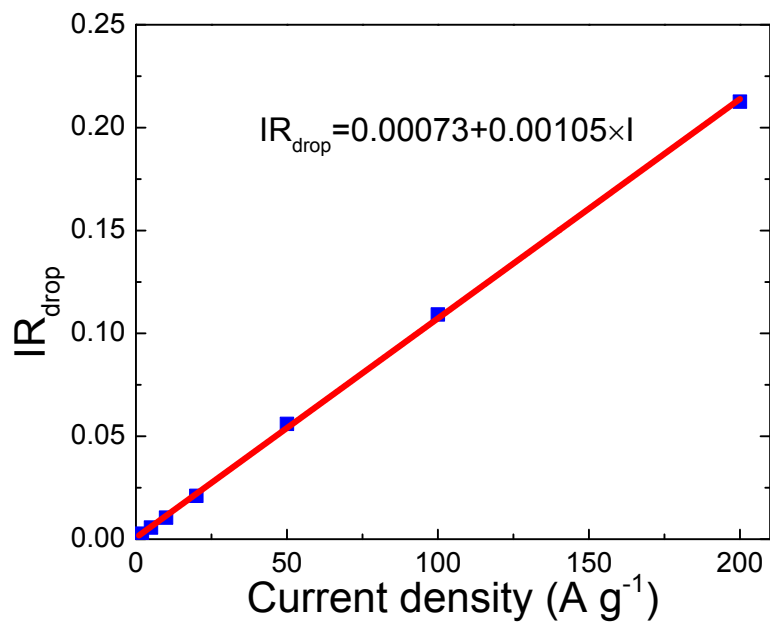

**Fig. S10** IR drop as a function of the current density.

Table S1 Supercapacitive comparison of various carbon materials.

| Sample <sup>[a]</sup> | SC <sup>[b]</sup><br>(F g <sup>-1</sup> ) | Current rate<br>(A g <sup>-1</sup> ) | SC<br>(F g <sup>-1</sup> ) | Current rate<br>(A g <sup>-1</sup> ) | Cycling<br>retention | Electrolyte                        | Test condition | Ref.         |
|-----------------------|-------------------------------------------|--------------------------------------|----------------------------|--------------------------------------|----------------------|------------------------------------|----------------|--------------|
| N-HCS                 | 266.9                                     | 0.5                                  | 224                        | 20                                   | 100% (1000)          | 6 M KOH                            | 3-Electrode    | 1            |
| N-HCS                 | 203                                       | 1                                    | 180                        | 10                                   | 100% (500)           | 6 M KOH                            | 2-Electrode    | 2            |
| N-CNF                 | 202                                       | 1                                    | 164.5                      | 30                                   | 97% (3000)           | 6 M KOH                            | 3-Electrode    | 3            |
| HCS                   | 270                                       | 0.5                                  | 196                        | 10                                   | 92% (1000)           | 6 M KOH                            | 3-Electrode    | 4            |
| N-HCS                 | 213                                       | 0.5                                  | 118                        | 10                                   | 91% (5000)           | 6 M KOH                            | 3-Electrode    | 5            |
| N-HCS                 | 310.4                                     | 1                                    | 157                        | 50                                   | 98.6% (10000)        | 6 M KOH                            | 3-Electrode    | 6            |
| N-HCS                 | 150                                       | 1                                    | -                          | -                                    | 88% (5000)           | 6 M KOH                            | 3-Electrode    | 7            |
| HCS                   | 230                                       | 0.5                                  | 159                        | 10                                   | 98% (1500)           | 6 M KOH                            | 3-Electrode    | 8            |
| N,P-HCS               | 232                                       | 1                                    | 158                        | 10                                   | 89.1% (3000)         | 6 M KOH                            | 3-Electrode    | 9            |
| N,P-C                 | 105                                       | 0.3                                  | 58                         | 10                                   | 89.5% (10000)        | 6 M KOH                            | 2-Electrode    | 10           |
| N-HCS                 | 210                                       | 0.5                                  | 90                         | 5                                    | 95.6% (1000)         | 6 M KOH                            | 3-Electrode    | 11           |
| HCS                   | 74.5                                      | 0.5                                  | 51                         | 10                                   | 100% (5000)          | 6 M KOH                            | 2-Electrode    | 12           |
| N-OMC                 | 213                                       | 0.2                                  | 137                        | 5                                    | -                    | 6 M KOH                            | 3-Electrode    | 13           |
| N,S-OMC               | 167                                       | 1                                    | 101                        | 50                                   | 97% (1000)           | 2 M KOH                            | 3-Electrode    | 14           |
| OMCS                  | 172                                       | 0.2                                  | 118                        | 20                                   | 98.2% (1000)         | 6 M KOH                            | 3-Electrode    | 15           |
| OMC                   | 211.6                                     | 0.5                                  | 125                        | 20                                   | 98% (300)            | 30% KOH                            | 3-Electrode    | 16           |
| N-OMCS                | 231                                       | 1                                    | 190                        | 50                                   | 100% (20000)         | 6 M KOH                            | 3-Electrode    | 17           |
| N-CNB                 | 305                                       | 0.1                                  | 170                        | 10                                   | 100% (10000)         | 1 M H <sub>2</sub> SO <sub>4</sub> | 2-Electrode    | 18           |
| N-HCS                 | 236                                       | 0.1                                  | 170                        | 80                                   |                      | 1 M H <sub>2</sub> SO <sub>4</sub> | 3-Electrode    | 19           |
| N-OMC                 | 173                                       | 0.2                                  | 114                        | 20                                   | 107.5% (10000)       | 1 M H <sub>2</sub> SO <sub>4</sub> | 3-Electrode    | 20           |
| OMC                   | 219                                       | 0.1                                  | 108                        | 5                                    | 140% (10000)         | 1 M H <sub>2</sub> SO <sub>4</sub> | 3-Electrode    | 21           |
| HCS/CNT               | 201.5                                     | 0.5                                  | 145                        | 20                                   | 90% (5000)           | 6 M KOH                            | 3-Electrode    | 22           |
| CNT                   | 286                                       | 0.1                                  | 203                        | 50                                   | 100% (10000)         | 6 M KOH                            | 3-Electrode    | 23           |
| CNF                   | 236                                       | 5                                    | 163                        | 50                                   | 100% (5000)          | 6 M KOH                            | 3-Electrode    | 24           |
| CNF                   | 256                                       | 0.2                                  | 170                        | 20                                   | 95% (1000)           | 6 M KOH                            | 3-Electrode    | 25           |
| 3D-HPC                | 318.2                                     | 0.5                                  | 189                        | 0.5                                  | 95.8% (10000)        | 6 M KOH                            | 2-Electrode    | 26           |
| HPC                   | 238                                       | 0.2                                  | 178                        | 30                                   | 95.7% (15000)        | 6 M KOH                            | 2-Electrode    | 27           |
| CNS                   | 276.5                                     | 1                                    | 227                        | 20                                   | 91% (5000)           | 6 M KOH                            | 2-Electrode    | 28           |
| Graphene              | 255                                       | 0.5                                  | 100                        | 30                                   | 93% (1200)           | 6 M KOH                            | 3-Electrode    | 29           |
| Graphene              | 189                                       | 0.05                                 | 123                        | 5                                    | 93% (5000)           | 6 M KOH                            | 2-Electrode    | 30           |
| CNB                   | 262                                       | 0.5                                  | 145                        | 50                                   | 102% (10000)         | 6 M KOH                            | 2-Electrode    | 31           |
| CNC                   | 205                                       | 1                                    | 179                        | 200                                  | 96.5% (20000)        | 6 M KOH                            | 2-Electrode    | 32           |
| CNC                   | 260                                       | 0.1                                  | 112                        | 100                                  | 90% (1000)           | 6 M KOH                            | 2-Electrode    | 33           |
| N-CNC                 | 313                                       | 1                                    | 234                        | 100                                  | 98% (20000)          | 6 M KOH                            | 2-Electrode    | 34           |
| HPC                   | 231                                       | 1                                    | 129                        | 2000                                 | 99% (20000)          | 6 M KOH                            | 2-Electrode    | 35           |
| Carbon<br>nanobowl    | 279                                       | 0.1                                  | 175                        | 200                                  | 92.4% (50000)        | 6 M KOH                            | 2-Electrode    | This<br>work |

[a] HCS: Hollow Carbon Sphere; OMC: Ordered Mesoporous Carbon; CNF: Carbon Nanofiber; CNT: Carbon Nanotube; HPC: Hierarchical Porous Carbon; CNS: Carbon Nanosheet; CNB: Carbon Nanobelt; CNC: Carbon Nanocage

[b] SC: Specific Capacitance

## References

1. H. Sun, Y. Zhu, B. Yang, Y. Wang, Y. Wu and J. Du, *J. Mater. Chem. A*, 2016, **4**, 12088-12097.
2. F. Xu, Z. Tang, S. Huang, L. Chen, Y. Liang, W. Mai, H. Zhong, R. Fu and DingcaiWu, *Nat. Commun.*, 2015, **6**, 7221.
3. L.-F. Chen, X.-D. Zhang, H.-W. Liang, M. Kong, Q.-F. Guan, P. Chen, Z.-Y. Wu and S.-H. Yu, *ACS Nano*, 2012, **6**, 7092–7102.
4. Y. Han, X. Dong, C. Zhang and S. Liu, *J. Power Sources*, 2012, **211**, 92-96.
5. J. Han, G. Xu, B. Ding, J. Pan, H. Dou and D. R. MacFarlane, *J. Mater. Chem. A*, 2014, **2**, 5352-5357.
6. H. Zhang, O. Noonan, X. Huang, Y. Yang, C. Xu, L. Zhou and C. Yu, *ACS Nano*, 2016, **10**, 4579–4586.
7. A. Chen, Y. Li, L. Liu, Y. Yu, K. Xia, Y. Wang and S. Li, *Appl. Surf. Sci.*, 2017, **393**, 151-158.
8. X. Liu, L. Zhou, Y. Zhao, L. Bian, X. Feng and Q. Pu, *ACS Appl. Mater. Interfaces*, 2013, **5**, 10280–10287.
9. B. Lv, P. Li, Y. Liu, S. Lin, B. Gao and B. Lin, *Applied Surface Science*, 2018, **437**, 169-175.
10. W. Liu, S. Zhang, S. U. Dar, Y. Zhao, R. Akram, X. Zhang, S. Jin, Z. Wu and D. Wu, *Carbon*, 2018, **129**, 420-427.
11. C. Yuan, X. Liu, M. Jia, Z. Luo and J. Yao, *J. Mater. Chem. A*, 2015, **3**, 3409-3415.
12. J. Liu, X. Wang, J. Gao, Y. Zhang, Q. Lu and M. Liu, *Electrochim. Acta*, 2016, **211**, 183–192.
13. J. Wei, D. Zhou, Z. Sun, Y. Deng, Y. Xia and D. Zhao, *Adv. Funct. Mater.*, 2013, **23**, 2322–2328.
14. D. Zhang, Y. Hao, L. Zheng, Y. Ma, H. Feng and H. Luo, *J. Mater. Chem. A*, 2013, **1**, 7584–7591.
15. X. Yu, J.-G. Wang, Z.-H. Huang, W. Shen and F. Kang, *Electrochemistry Communications*, 2013, **36**, 66-70.
16. W. Xing, S. Z. Qiao, R. G. Ding, F. Li, G. Q. Lu, Z. F. Yan and H. M. Cheng, *Carbon*, 2006, **44**, 216-224.
17. J.-G. Wang, H. Liu, H. Sun, W. Hua, H. Wang, X. Liu and B. Wei, *Carbon*, 2018, **127**, 85-92.
18. Z. Lin, H. Tian, F. Xu, X. Yang, Y. Mai and X. Feng, *Polym. Chem.*, 2016, **7**, 2092–2098.
19. G. A. Ferrero, A. B. Fuertes and M. Sevilla, *J. Mater. Chem. A* 2015, **3**, 2914-2923.
20. H. Chen, M. Zhou, Z. Wang, S. Zhao and S. Guan, *Electrochim. Acta*, 2014, **148**, 187-194.
21. T. Cai, M. Zhou, D. Ren, G. Han and S. Guan, *J. Power Sources*, 2013, **231**, 197-202.
22. Q. Wang, J. Yan, Y. Wang, G. Ning, Z. Fan, T. Wei, J. Cheng, M. Zhang and X. Jing, *Carbon*, 2013, **52**, 209-218.
23. J.-G. Wang, H. Liu, X. Zhang, X. Li, X. Liu and F. Kang, *Small*, 2018, 1703950.
24. Y. Sun, R. B. Sills, X. Hu, Z. W. Seh, X. Xiao, H. Xu, W. Luo, H. Jin, Y. Xin, T. Li, Z. Zhang, J. Zhou, W. Cai, Y. Huang and Y. Cui, *Nano Lett.*, 2015, **15** 3899–3906.
25. C. Ma, Y. Song, J. Shi, D. Zhang, X. Zhai, M. Zhong, Q. Guo and L. Liu, *Carbon* 2013, **51**, 290-300.
26. L. Qie, W. Chen, H. Xu, X. Xiong, Y. Jiang, F. Zou, X. Hu, Y. Xin, Z. Zhang and Y. Huang, *Energy Environ. Sci.*, 2013, **6**, 2497-2504.
27. P. Cheng, S. Gao, P. Zang, X. Yang, Y. Bai, H. Xu, Z. Liu and Z. Lei, *Carbon*, 2015, **93**, 315-324.
28. Q. Wang, J. Yan, T. Wei, J. Feng, Y. Ren, Z. Fan, M. Zhang and X. Jing, *Carbon*, 2013 **60**, 481 –487.
29. Z. Lei, L. Lu and X. S. Zhao, *Energy Environ. Sci.*, 2012, **5**, 6391-6399.
30. B. Xu, S. Yue, Z. Sui, X. Zhang, S. Hou, G. Cao and Y. Yang, *Energy Environ. Sci.*, 2011, **4**, 2826-2830.
31. T. Ouyang, K. Cheng, F. Yang, L. Zhou, K. Zhu, K. Ye, G. Wang and D. Cao, *J. Mater. Chem. A*, 2017, **5**, 14551-14561.
32. Y. Bu, T. Sun, Y. Cai, L. Du, O. Zhuo, L. Yang, Q. Wu, X. Wang and Z. Hu, *Adv. Mater.*, 2017, 1700470.
33. K. Xie, X. Qin, X. Wang, Y. Wang, H. Tao, Q. Wu, L. Yang and Z. Hu, *Adv. Mater.*, 2012, **24**, 2012.
34. J. Zhao, H. Lai, Z. Lyu, Y. Jiang, K. Xie, X. Wang, Q. Wu, L. Yang, Z. Jin, Y. Ma, J. Liu and Z. Hu, *Adv. Mater.*, 2015, **27**, 3541–3545.
35. J. Zhao, Y. Jiang, H. Fan, M. Liu, O. Zhuo, X. Wang, Q. Wu, L. Yang, Y. Ma and Z. Hu, *Adv. Mater.*, 2017,

1604569.
